# Supplementary material for: HMGCS2 Mediation of Ketone Levels Affects Sorafenib Treatment Efficacy in Liver Cancer Cells
Source: MDPI journal article supplement (doi:10.3390/molecules27228015), 2022-11-18
Supplement: s1 [file s1]

# HMGCs2 mediation of ketone levels affects sorafenib treatment efficacy in liver cancer cells

Fat-Moon Suk<sup>1, 2, #</sup>, Chien-Ying Wu<sup>3, #</sup>, Wan-Chun Chiu<sup>4, 5, 6</sup>, Chia-Ying Chien<sup>3</sup>, Tzu-Lang Chen<sup>7</sup>, Yi-Jen Liao<sup>3, \*</sup>

**Figure S1**

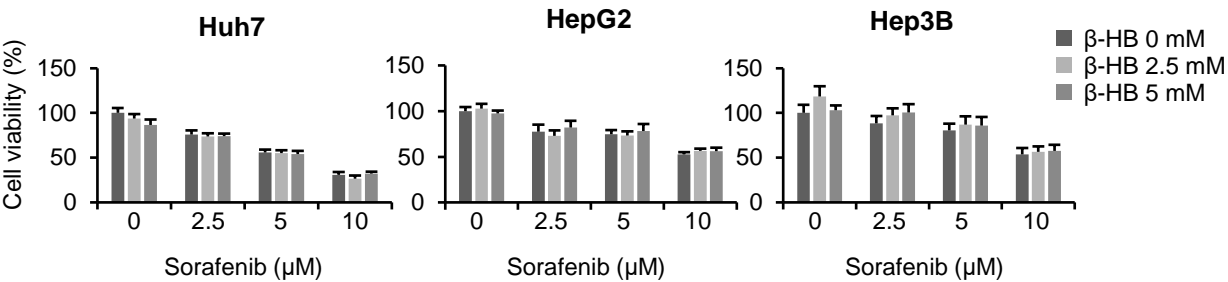

Huh7, Hep3B, and HepG2 cells were maintained in β-HB (0, 2.5, 5 mM)- supplemented medium for 2 days, and then cells were re-seeded in 96-well plates and treated with 0, 2.5, 5, and 10 μM sorafenib for 48 h. An MTT assay was conducted to detect cell viability.
